# Supplementary material for: Room Temperature Syntheses of ZnO and Its Structure
Source: Preprints.org preprint supplement (doi:10.20944/preprints202103.0660.v1), 2021-03-26
Supplement: Supplementary file 2 [file supplementary]

Supplementary Information

Room Temperature syntheses of ZnO and its structure

Domenica Tommasa Donia1, Elvira Maria Bauer2, Mauro Missori3 Ludovica Roselli4, Daniele Cecchetti4, Pietro Tagliatesta4, Lorenzo Gontrani5,*, Marilena Carbone2,4*

1 Department of Surgical Science, University of Rome Tor Vergata, Via Montpellier 1, 00133, Rome, Italy

2 Italian National Research Council – Institute of Structure of Matter (CNR-ISM), Via Salaria km 29.3, 00015 Monterotondo, RM, Italy

3 Istituto dei Sistemi Complessi, Consiglio Nazionale delle Ricerche, Unit “Sapienza”, Piazzale Aldo Moro 5, 00185 Rome, Italy

4 Department of Chemical Science and Technologies, University of Rome Tor Vergata, Via della Ricerca Scientifica 1 – 00133 Rome, Italy

5 Department of Chemistry, Sapienza University of Rome, P.le A. Moro 2, Rome, 00185, Italy

* Correspondence MC: Carbone@uniroma2.it

and

* Correspondence LG: Lorenzo.Gontrani@uniroma1.it


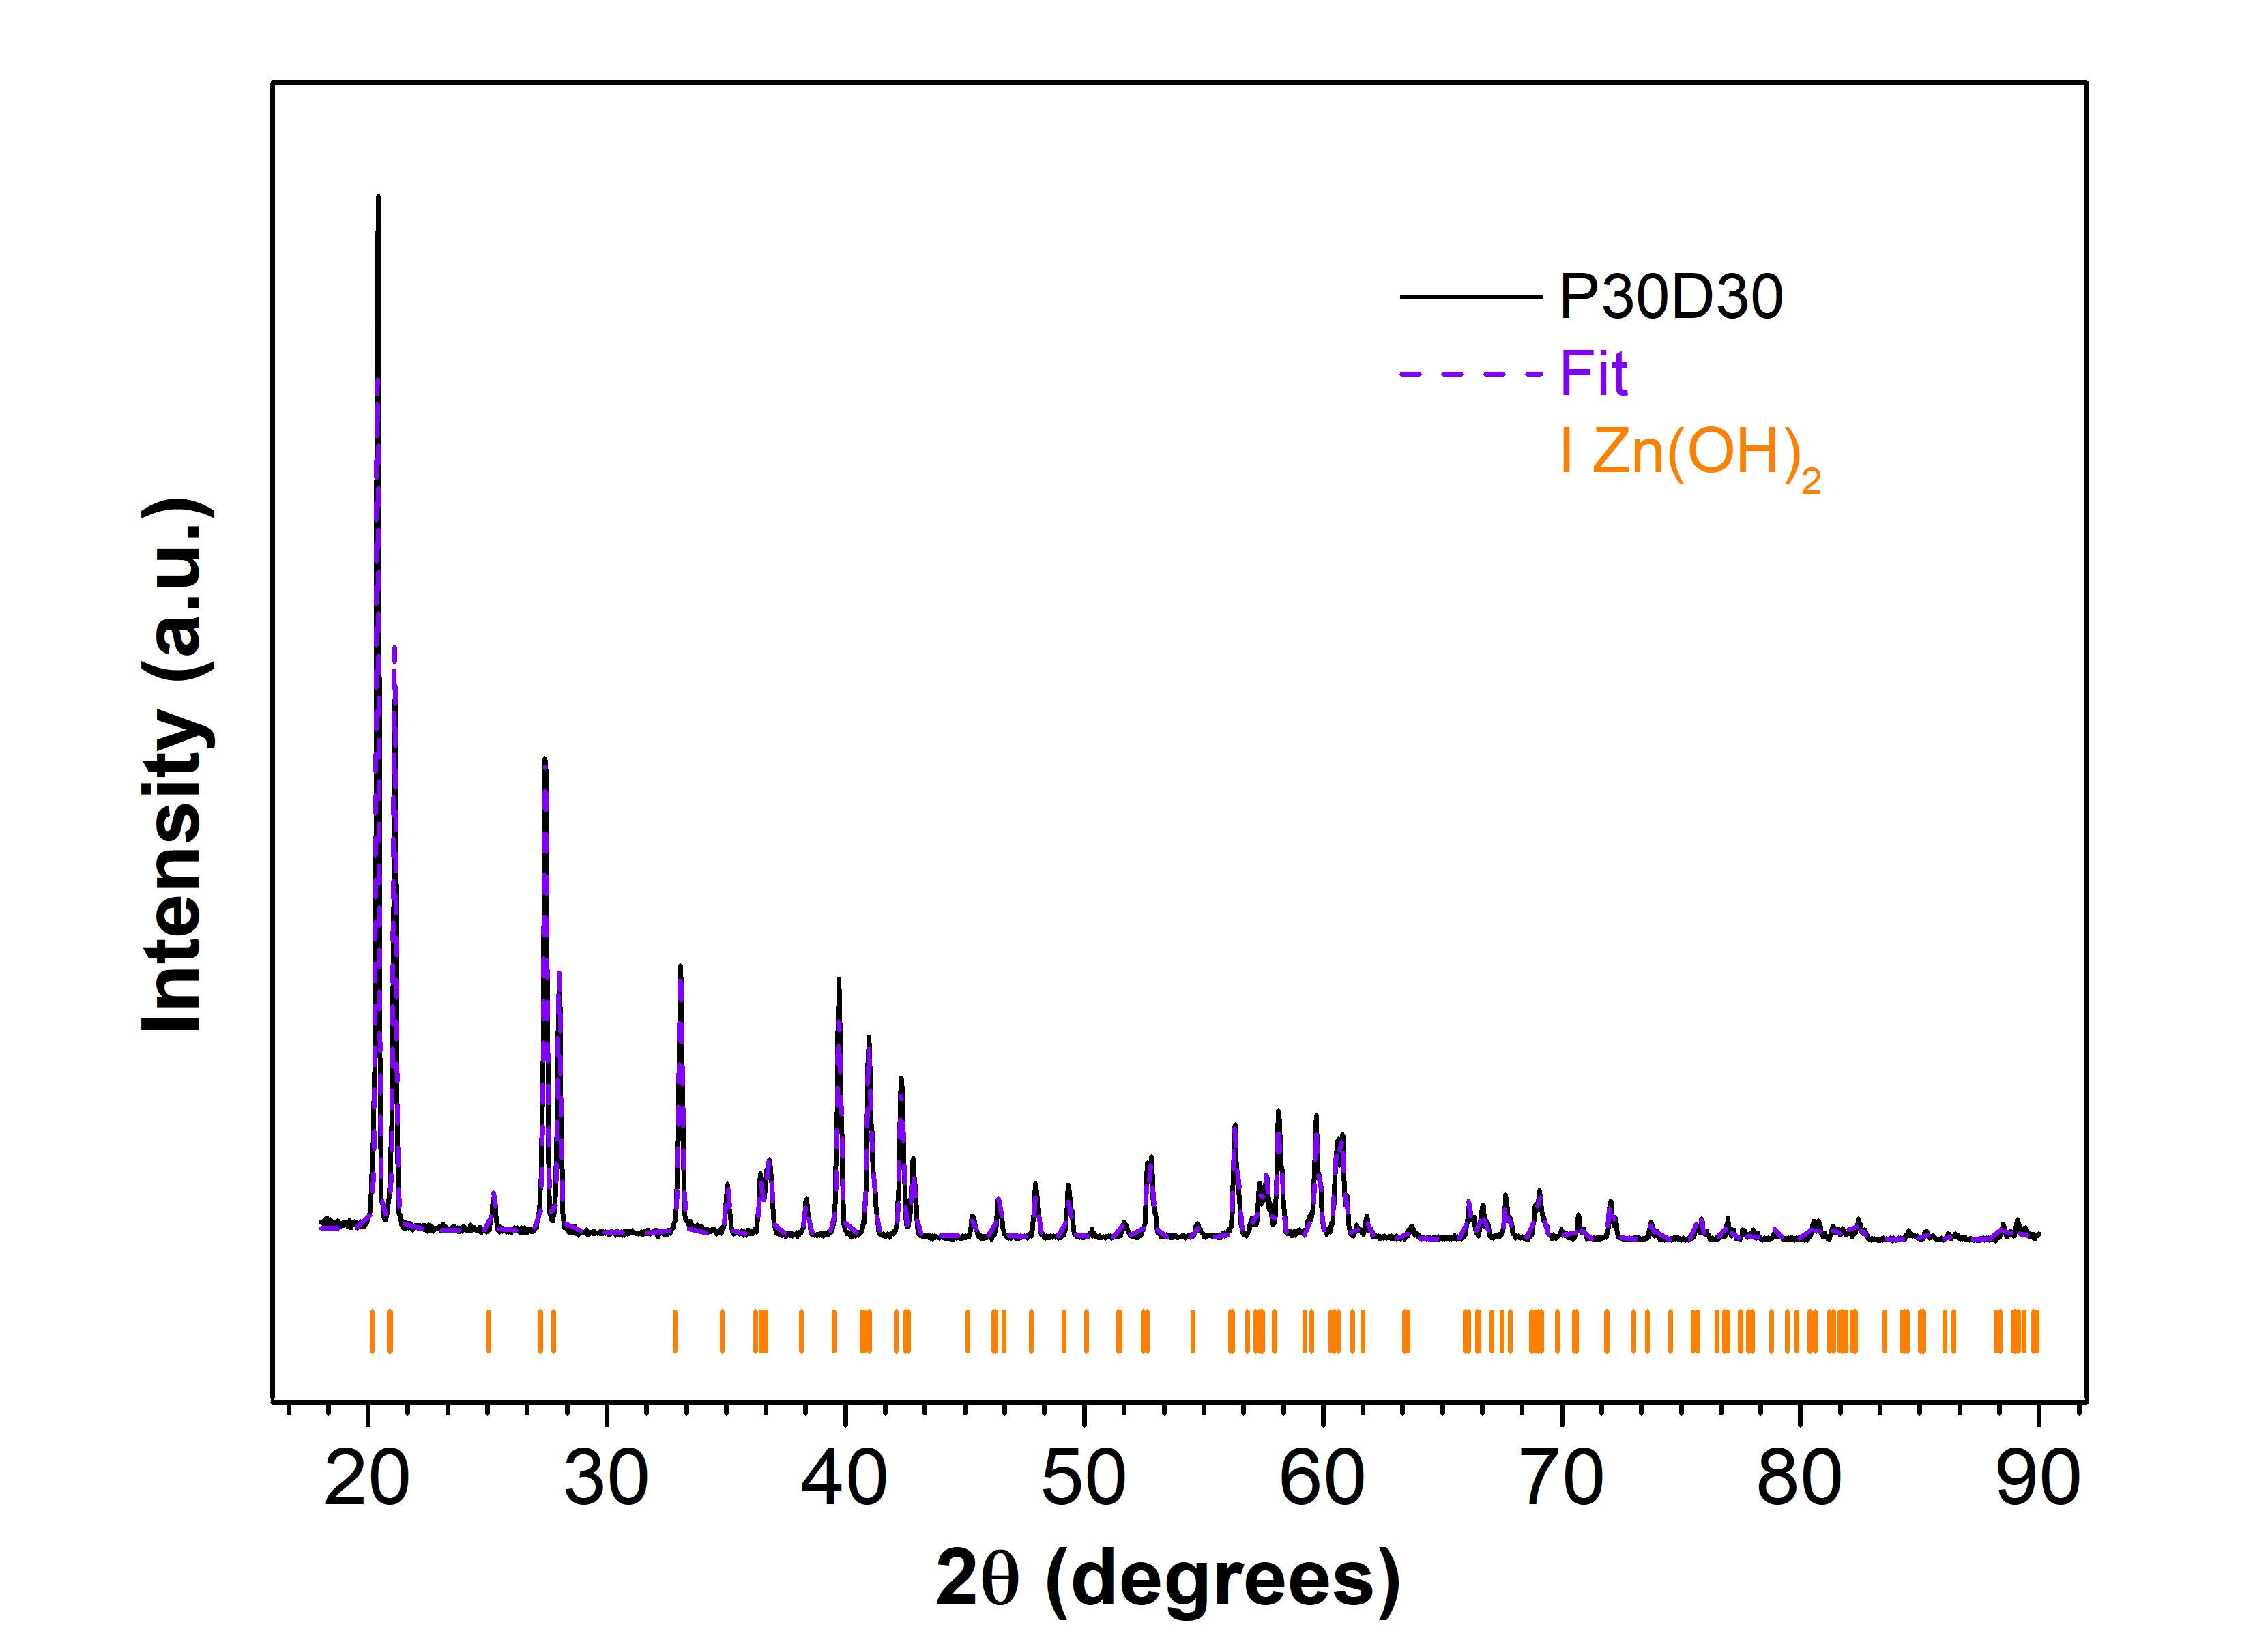


**Figure SI1****.** XRD patterns of the sample P30D30 and associated Rietveld fit.


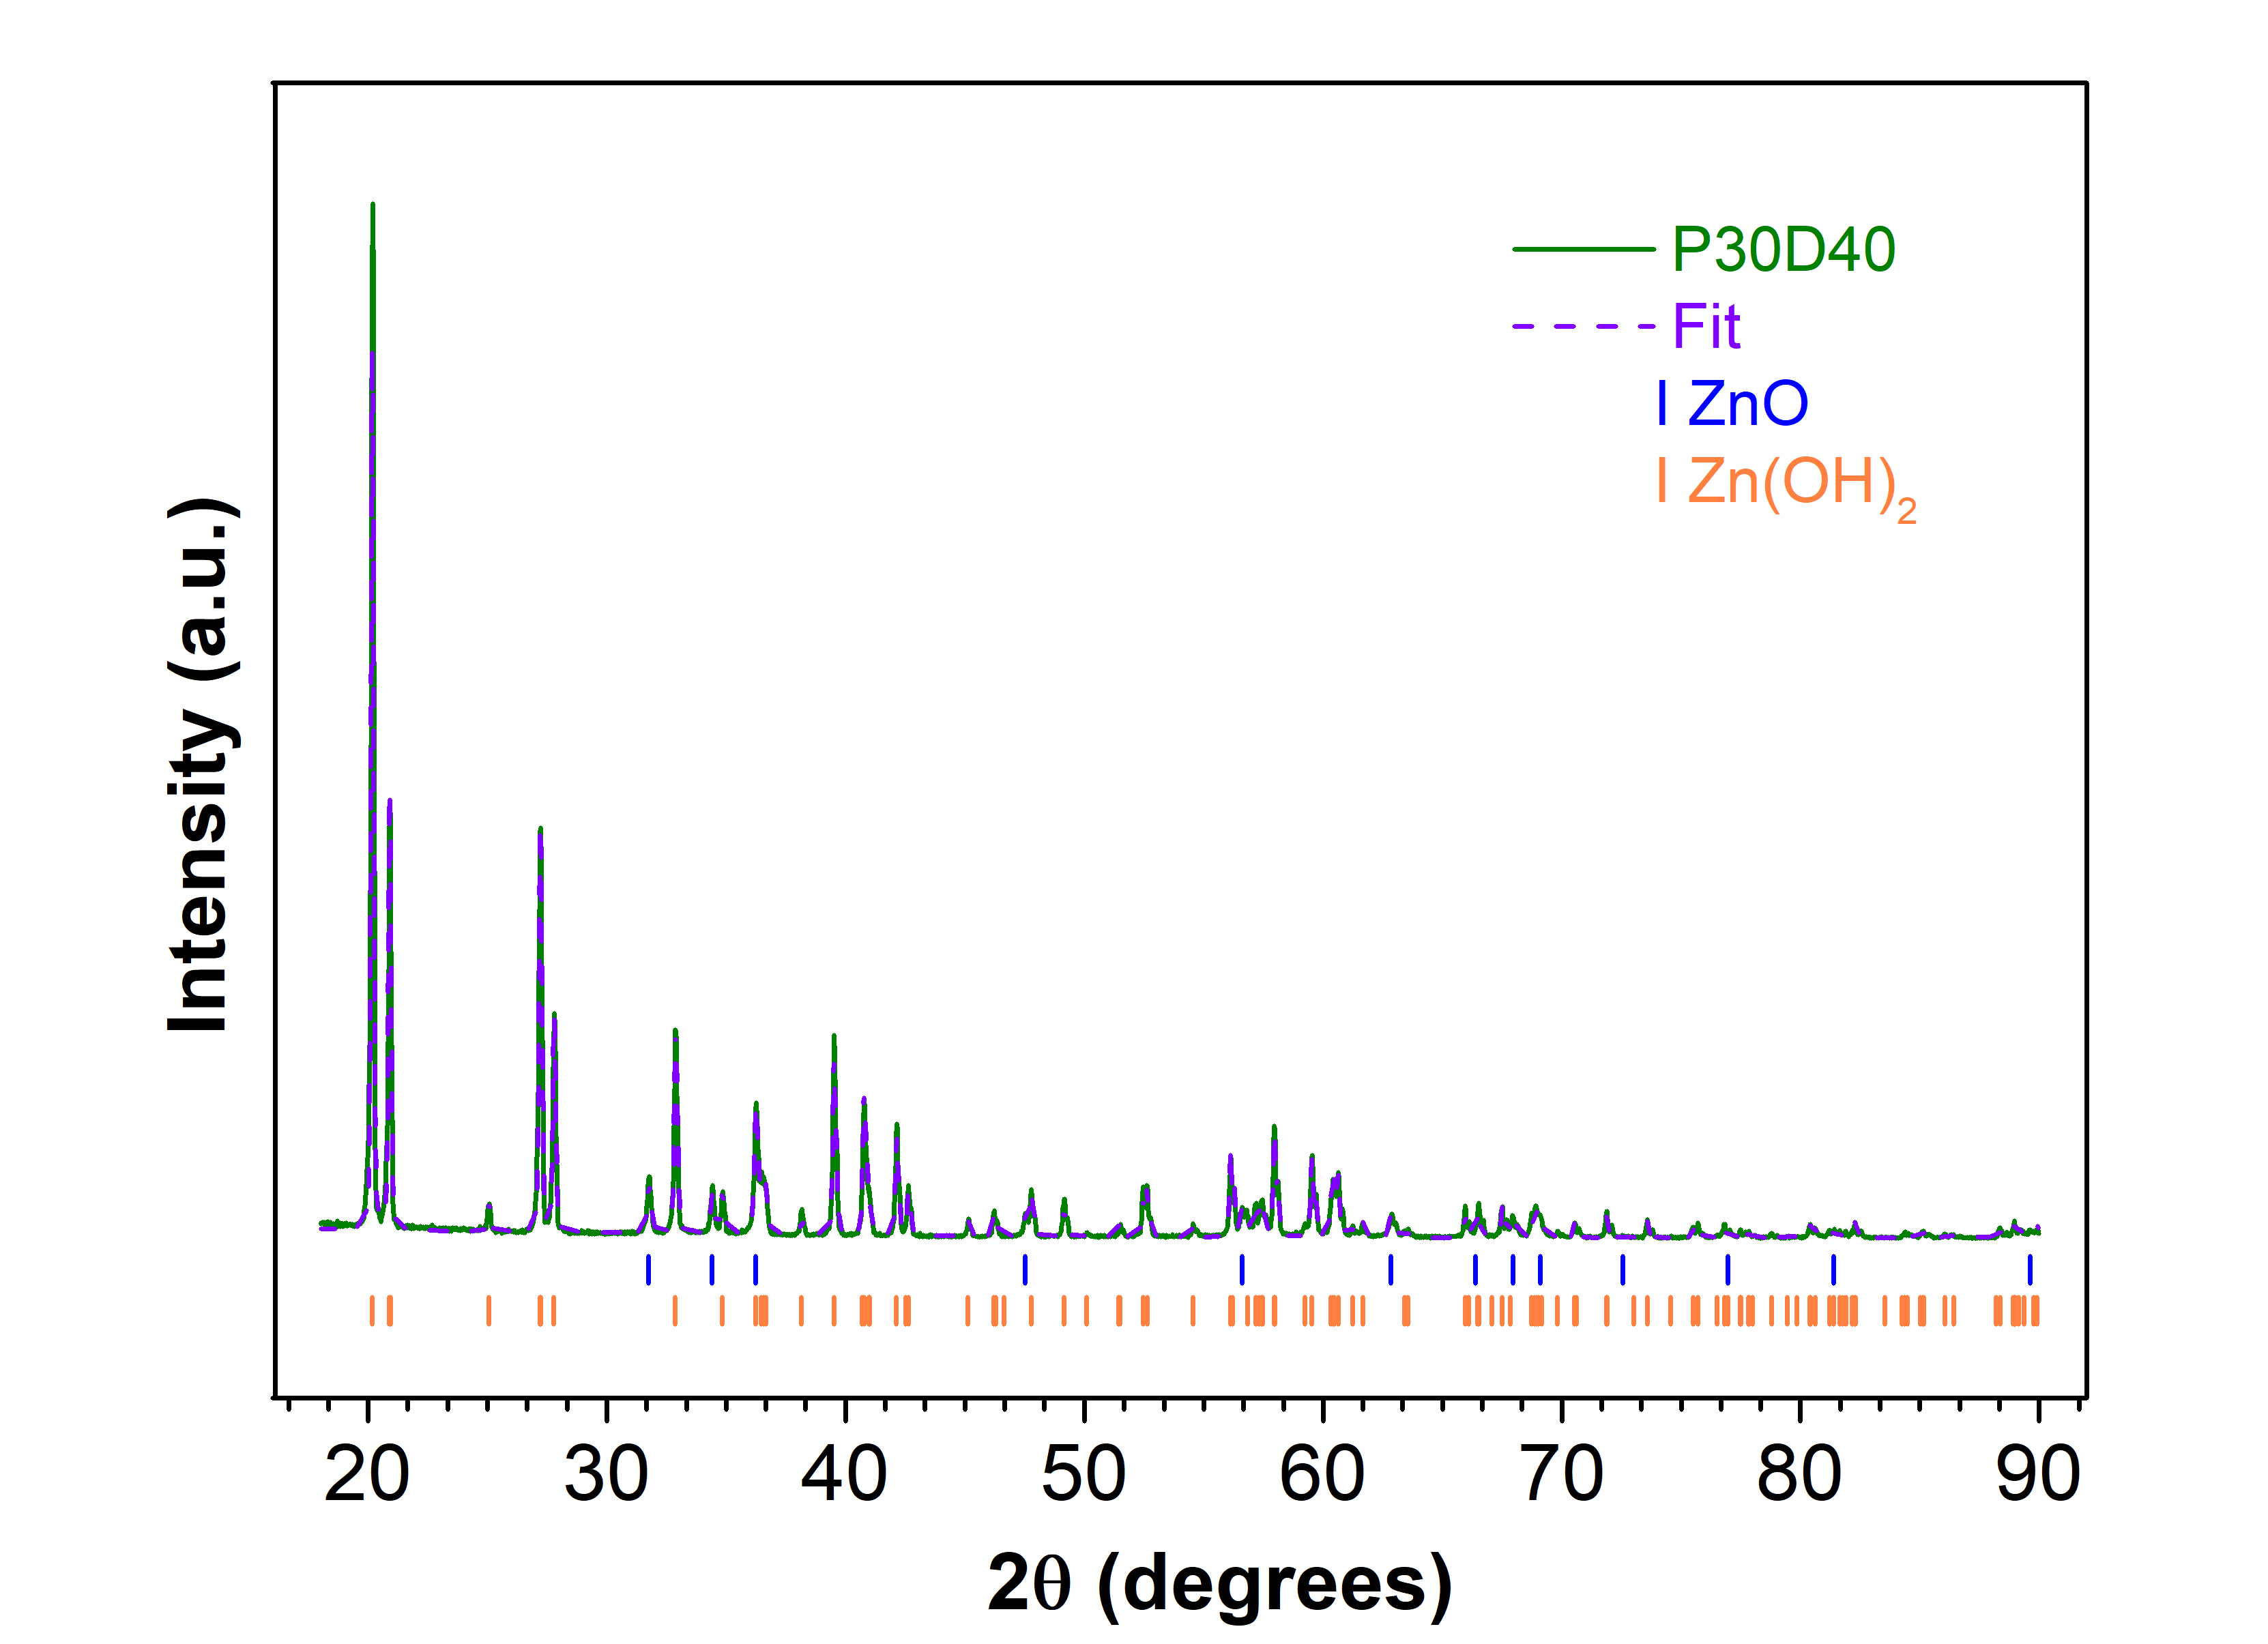


**Figure SI2.** XRD patterns of the sample P30D40 and associated Rietveld fit.


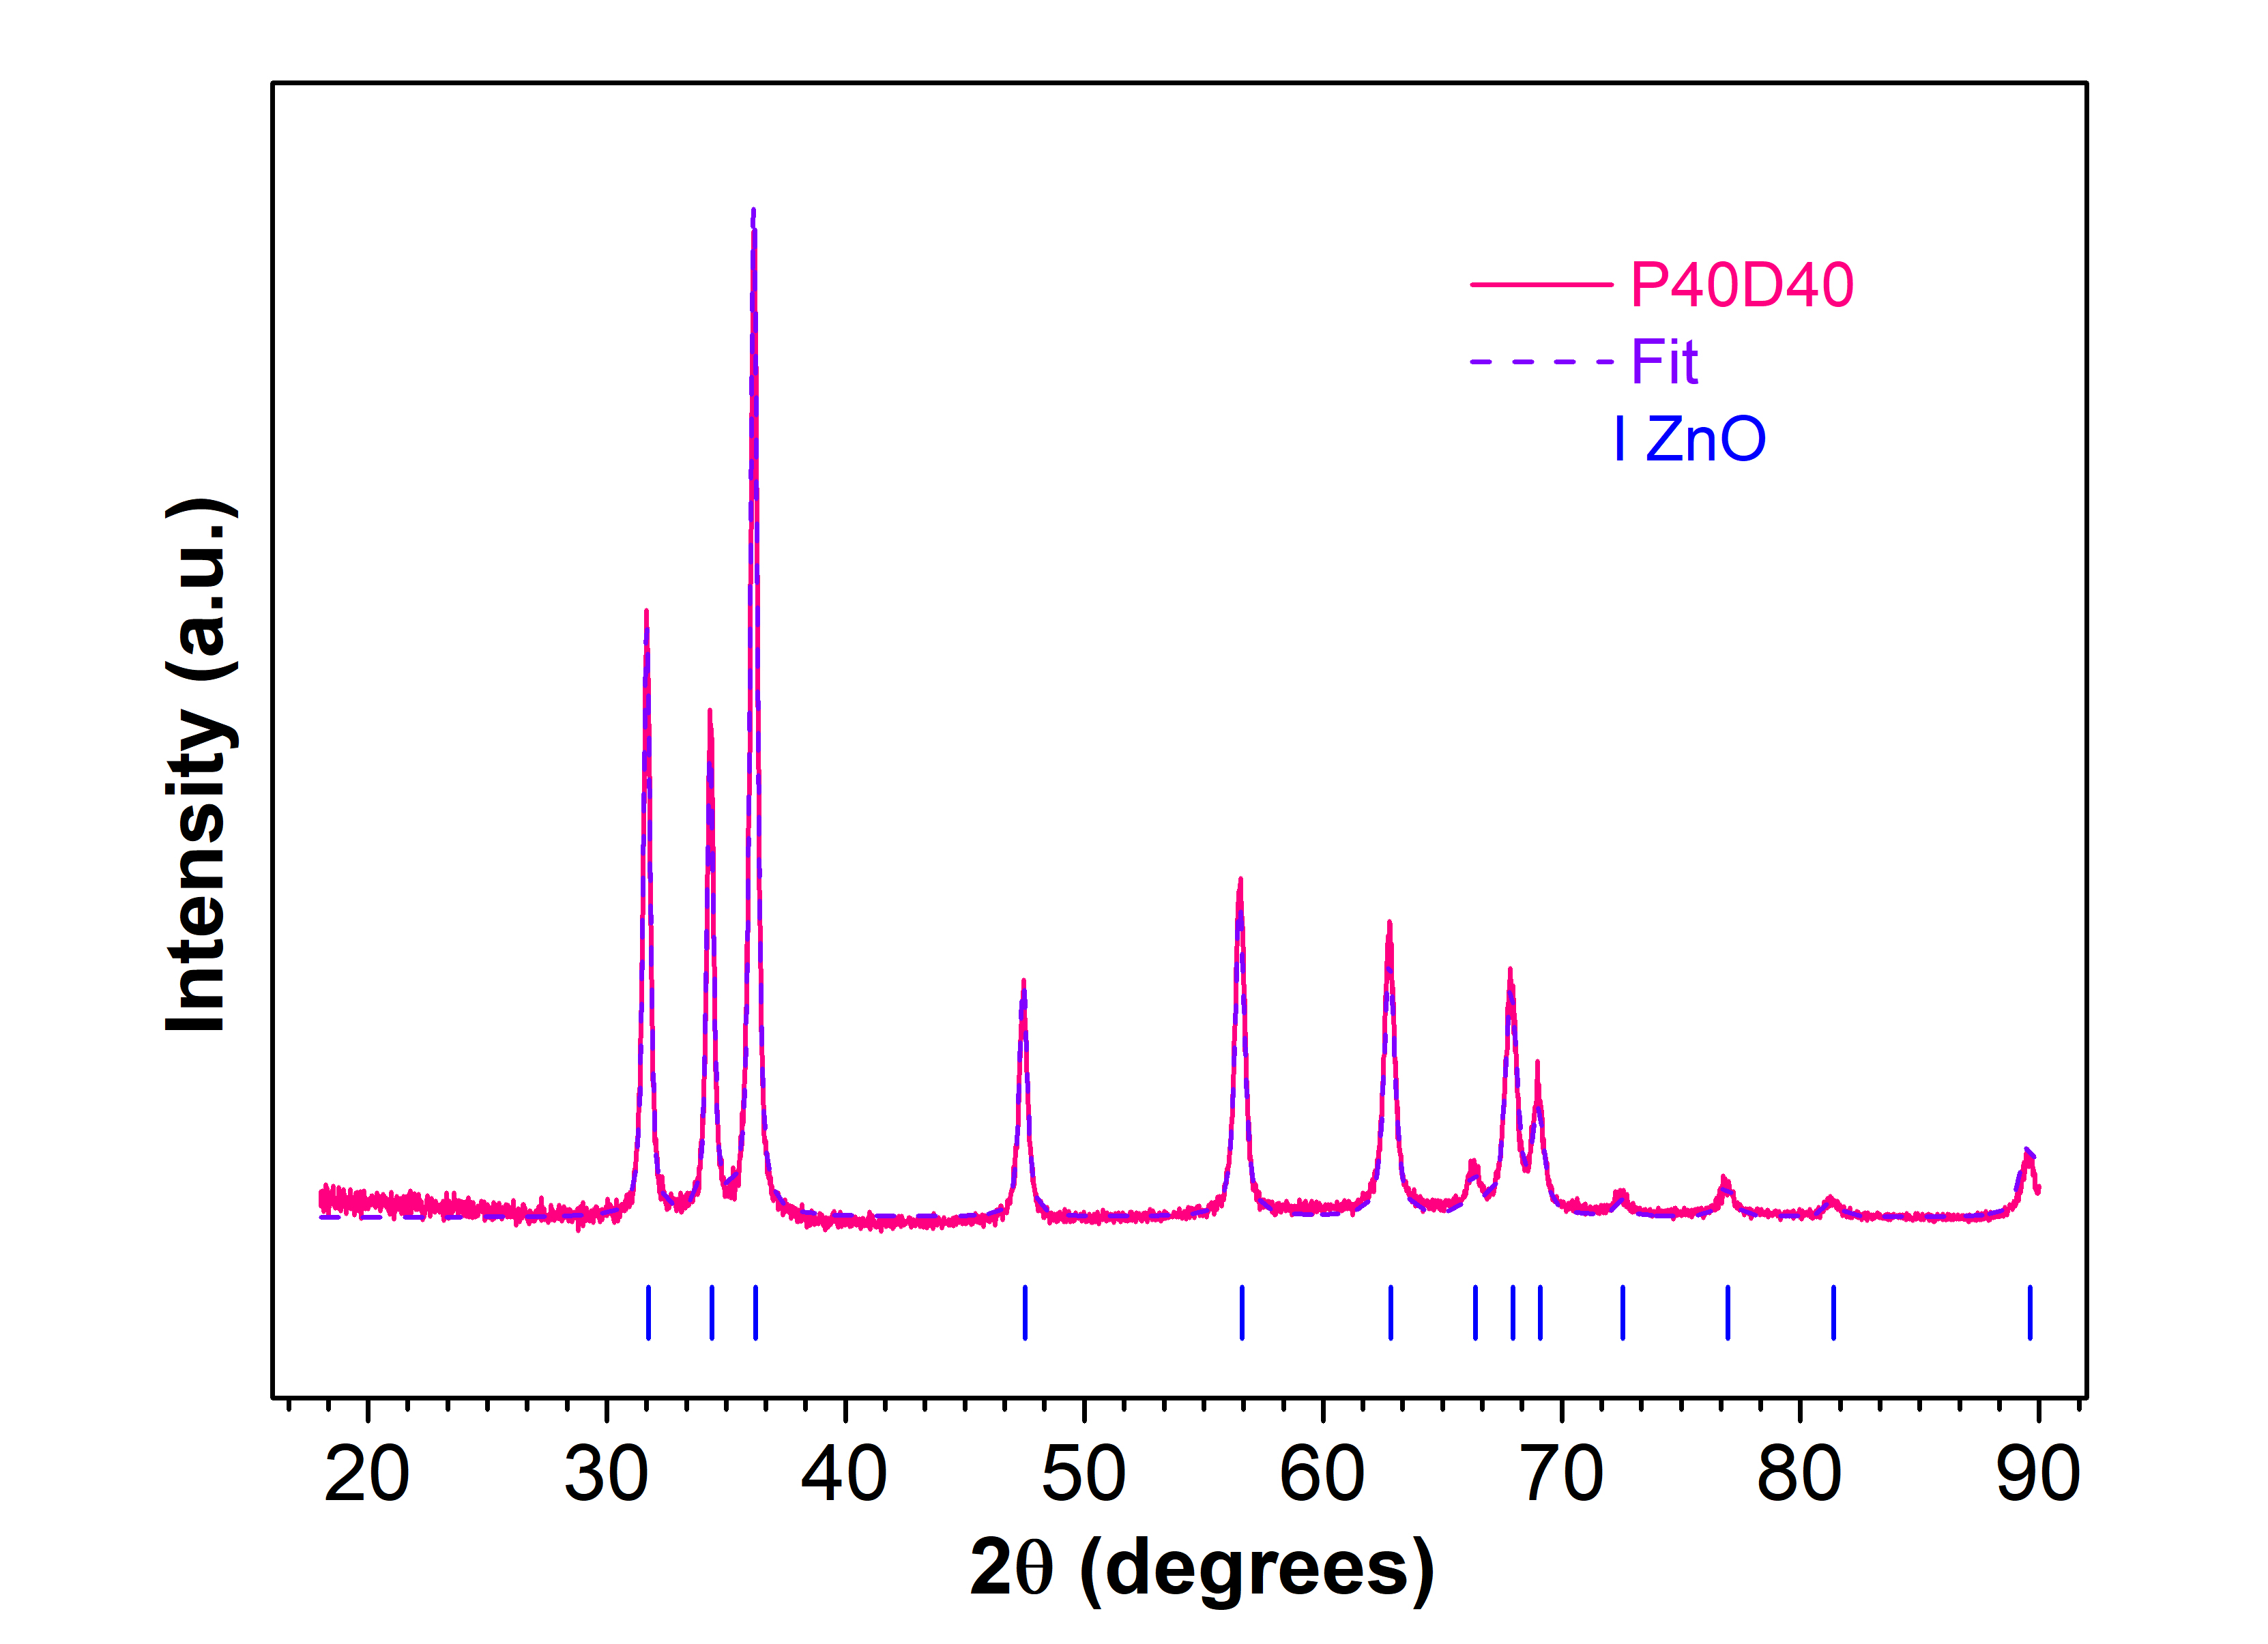


**Figure SI3.** XRD patterns of the sample P40D40 and associated Rietveld fit.


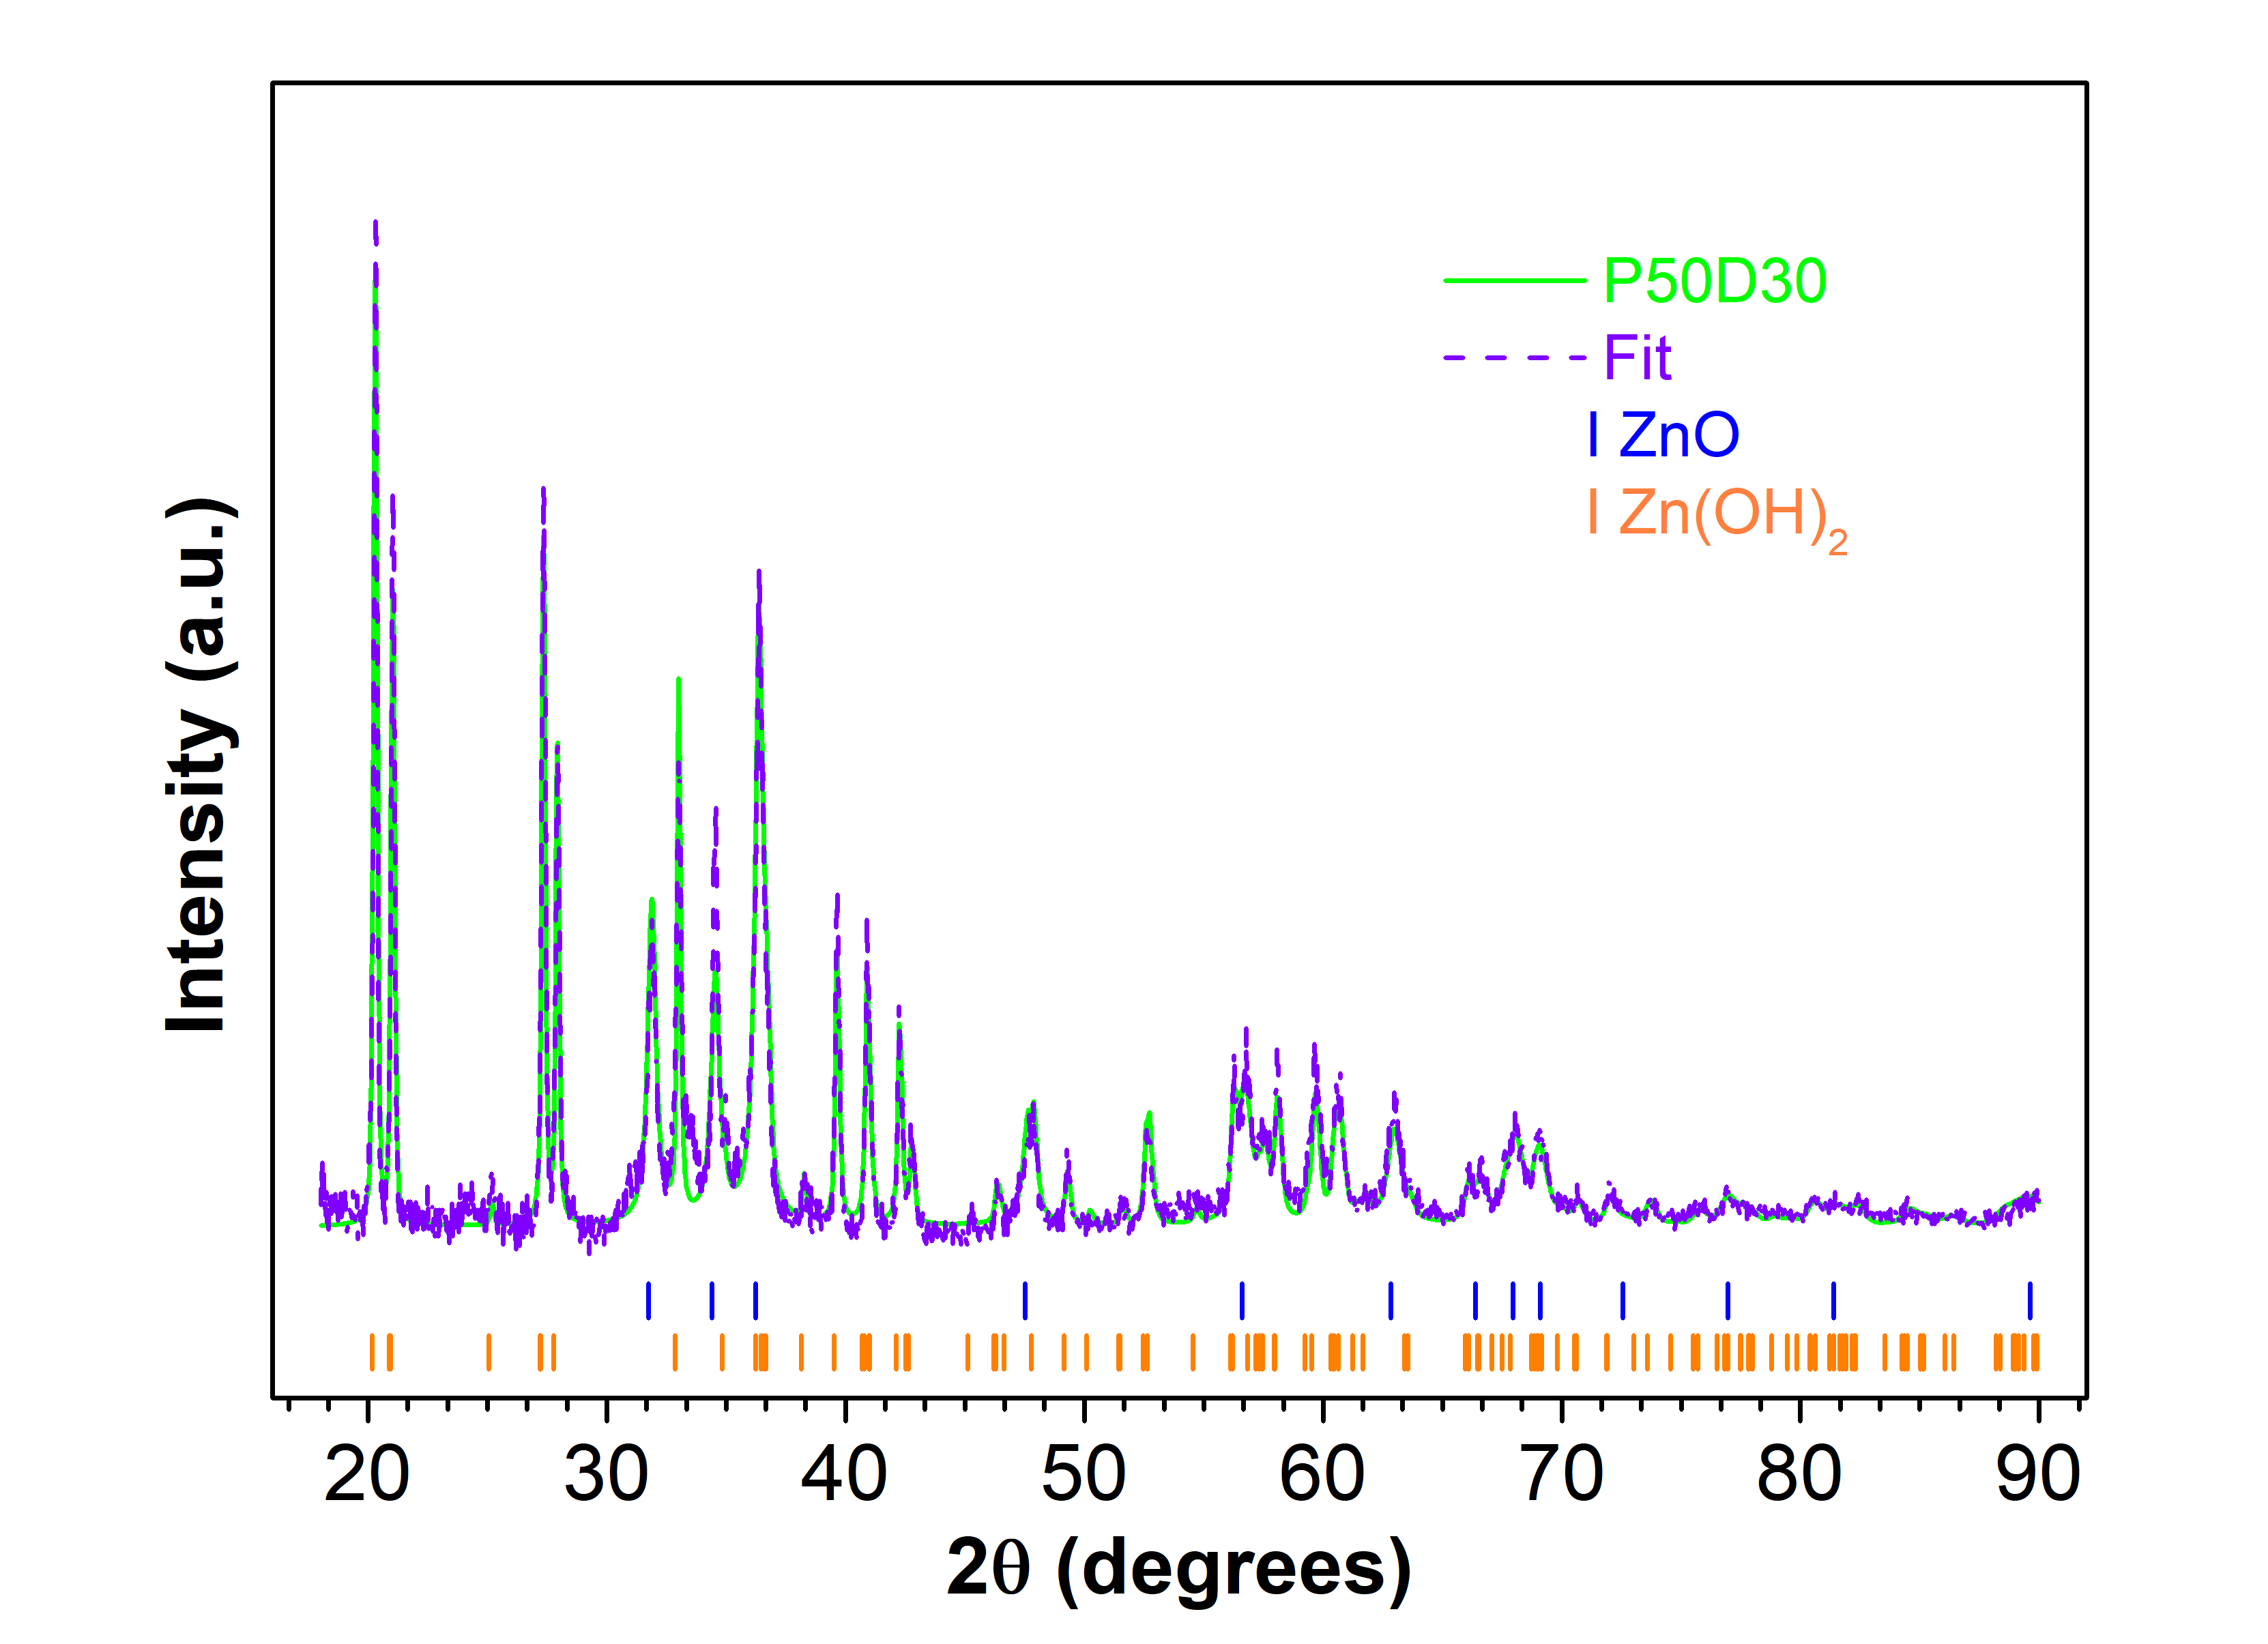


**Figure SI4.** XRD patterns of the sample P50D30 and associated Rietveld fit.


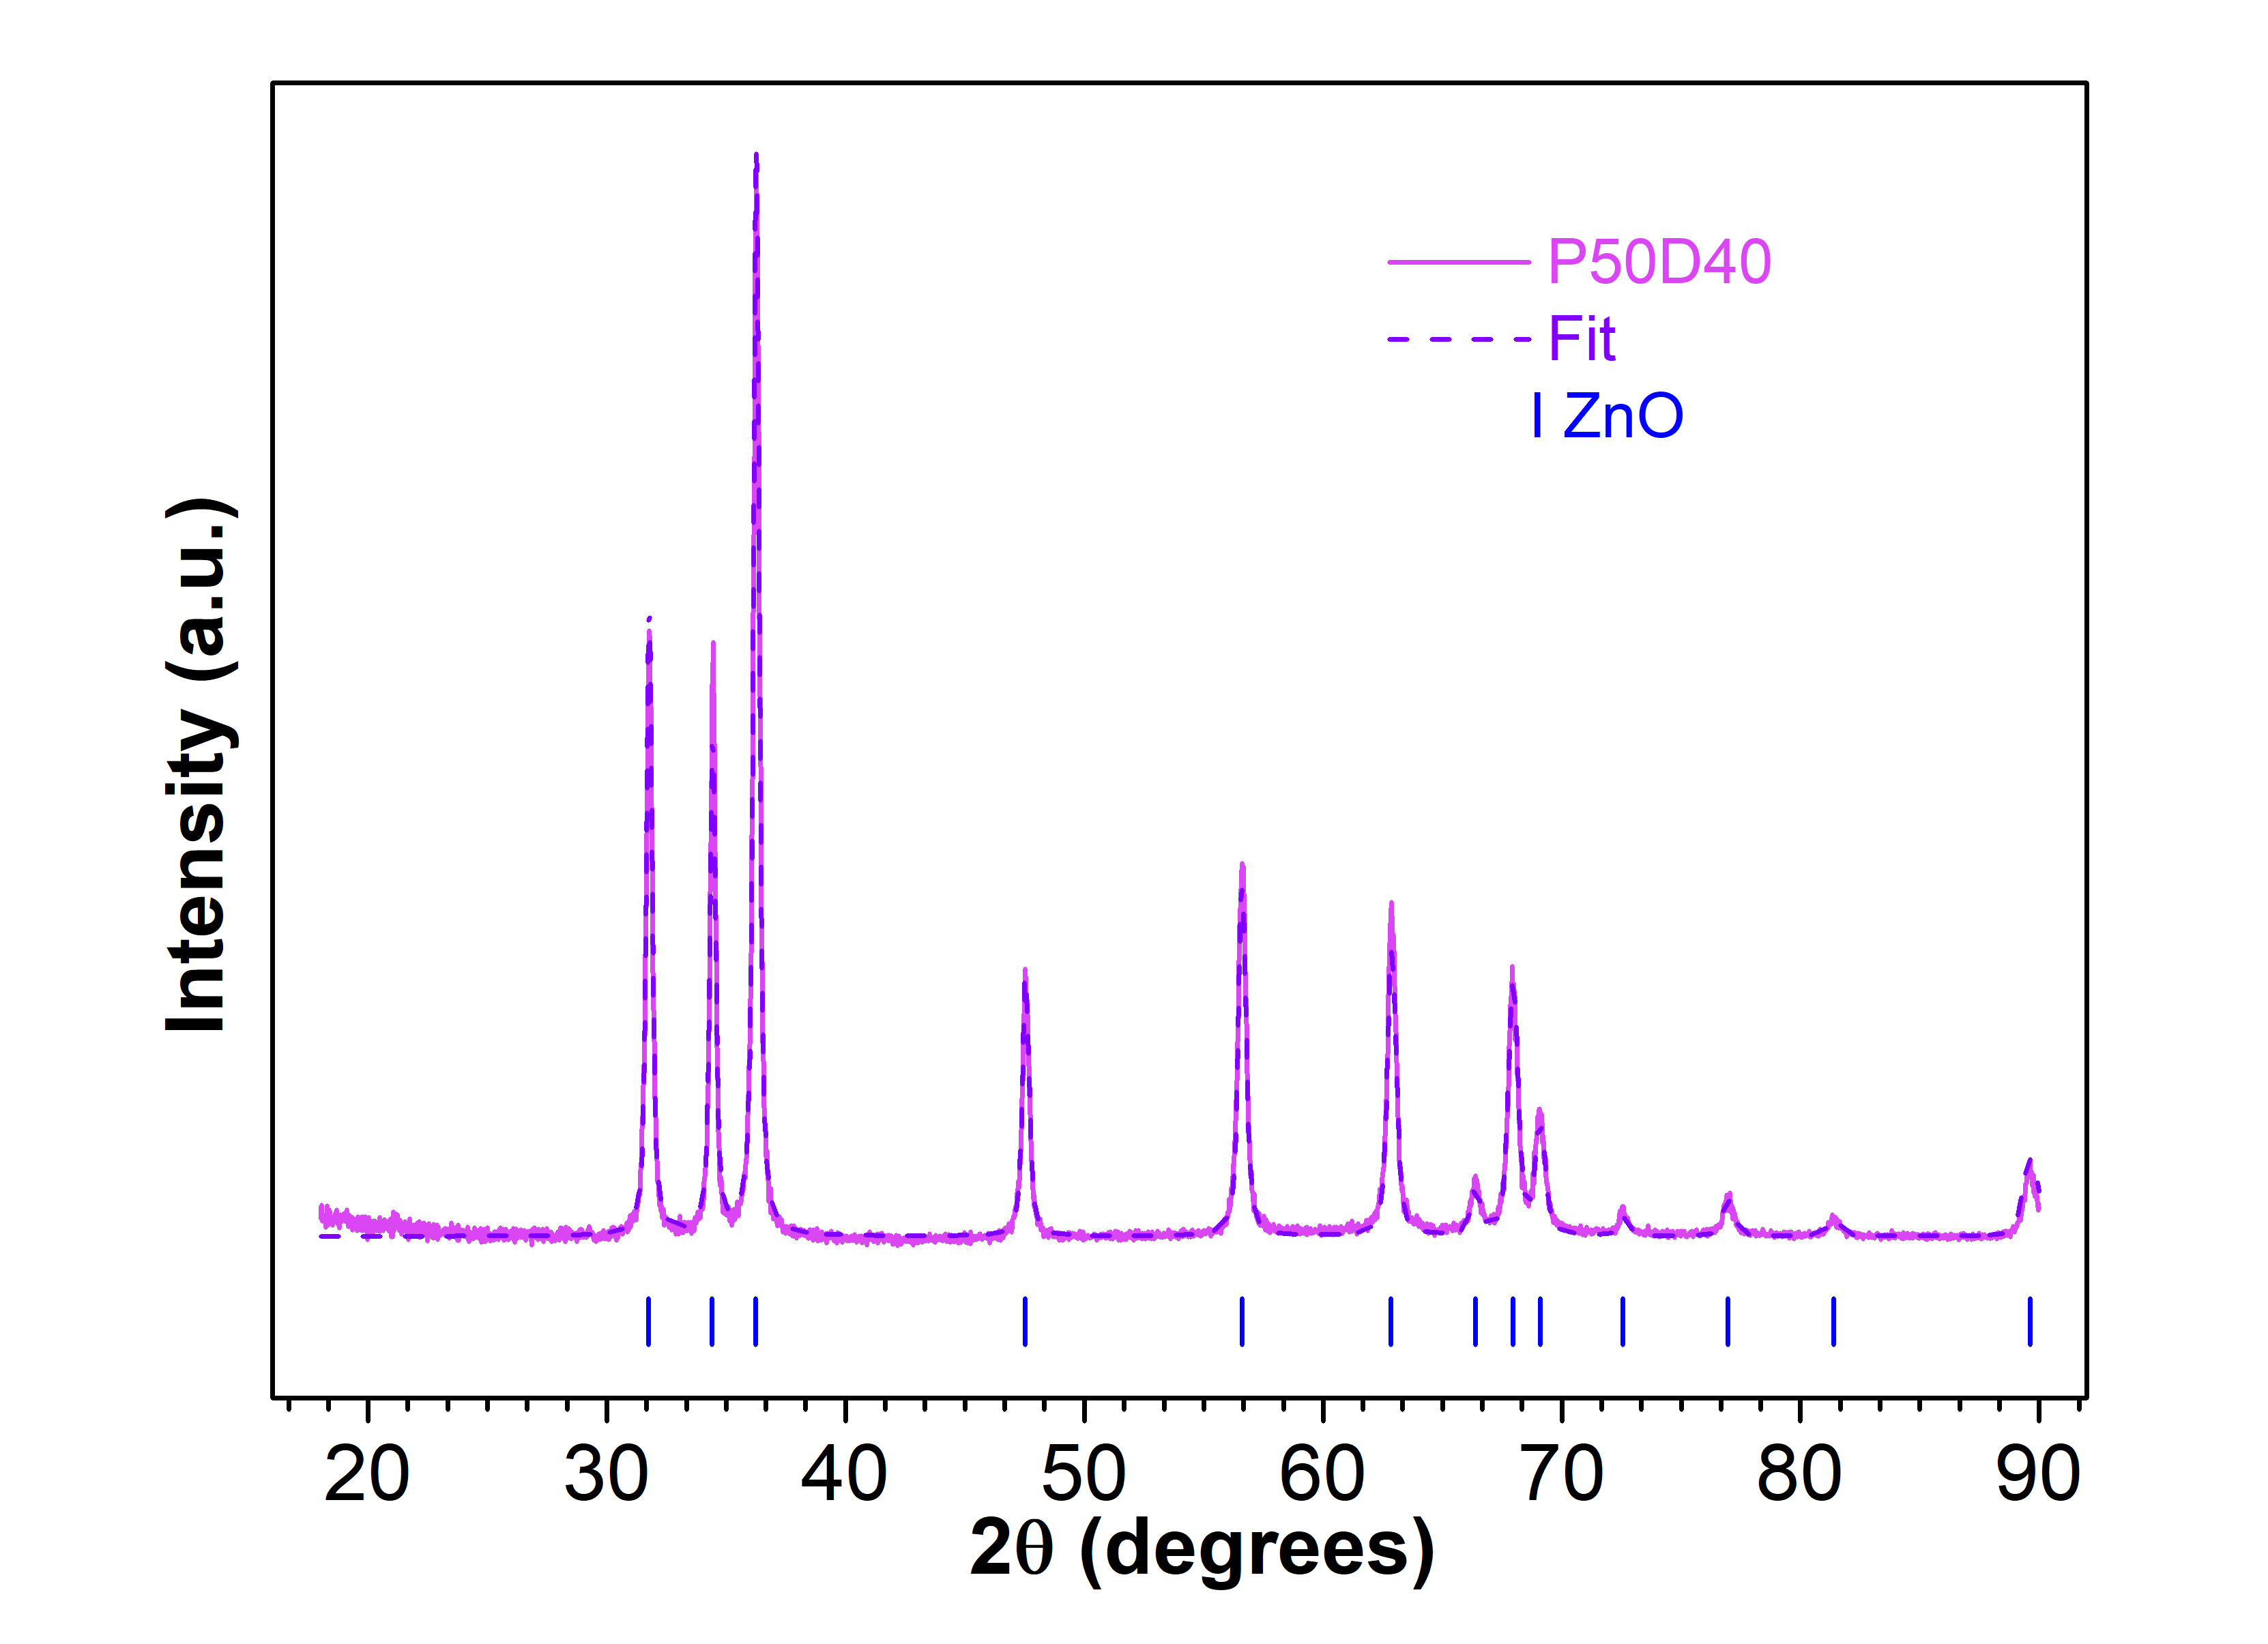


**Figure SI5.** XRD patterns of the sample P50D40 and associated Rietveld fit.


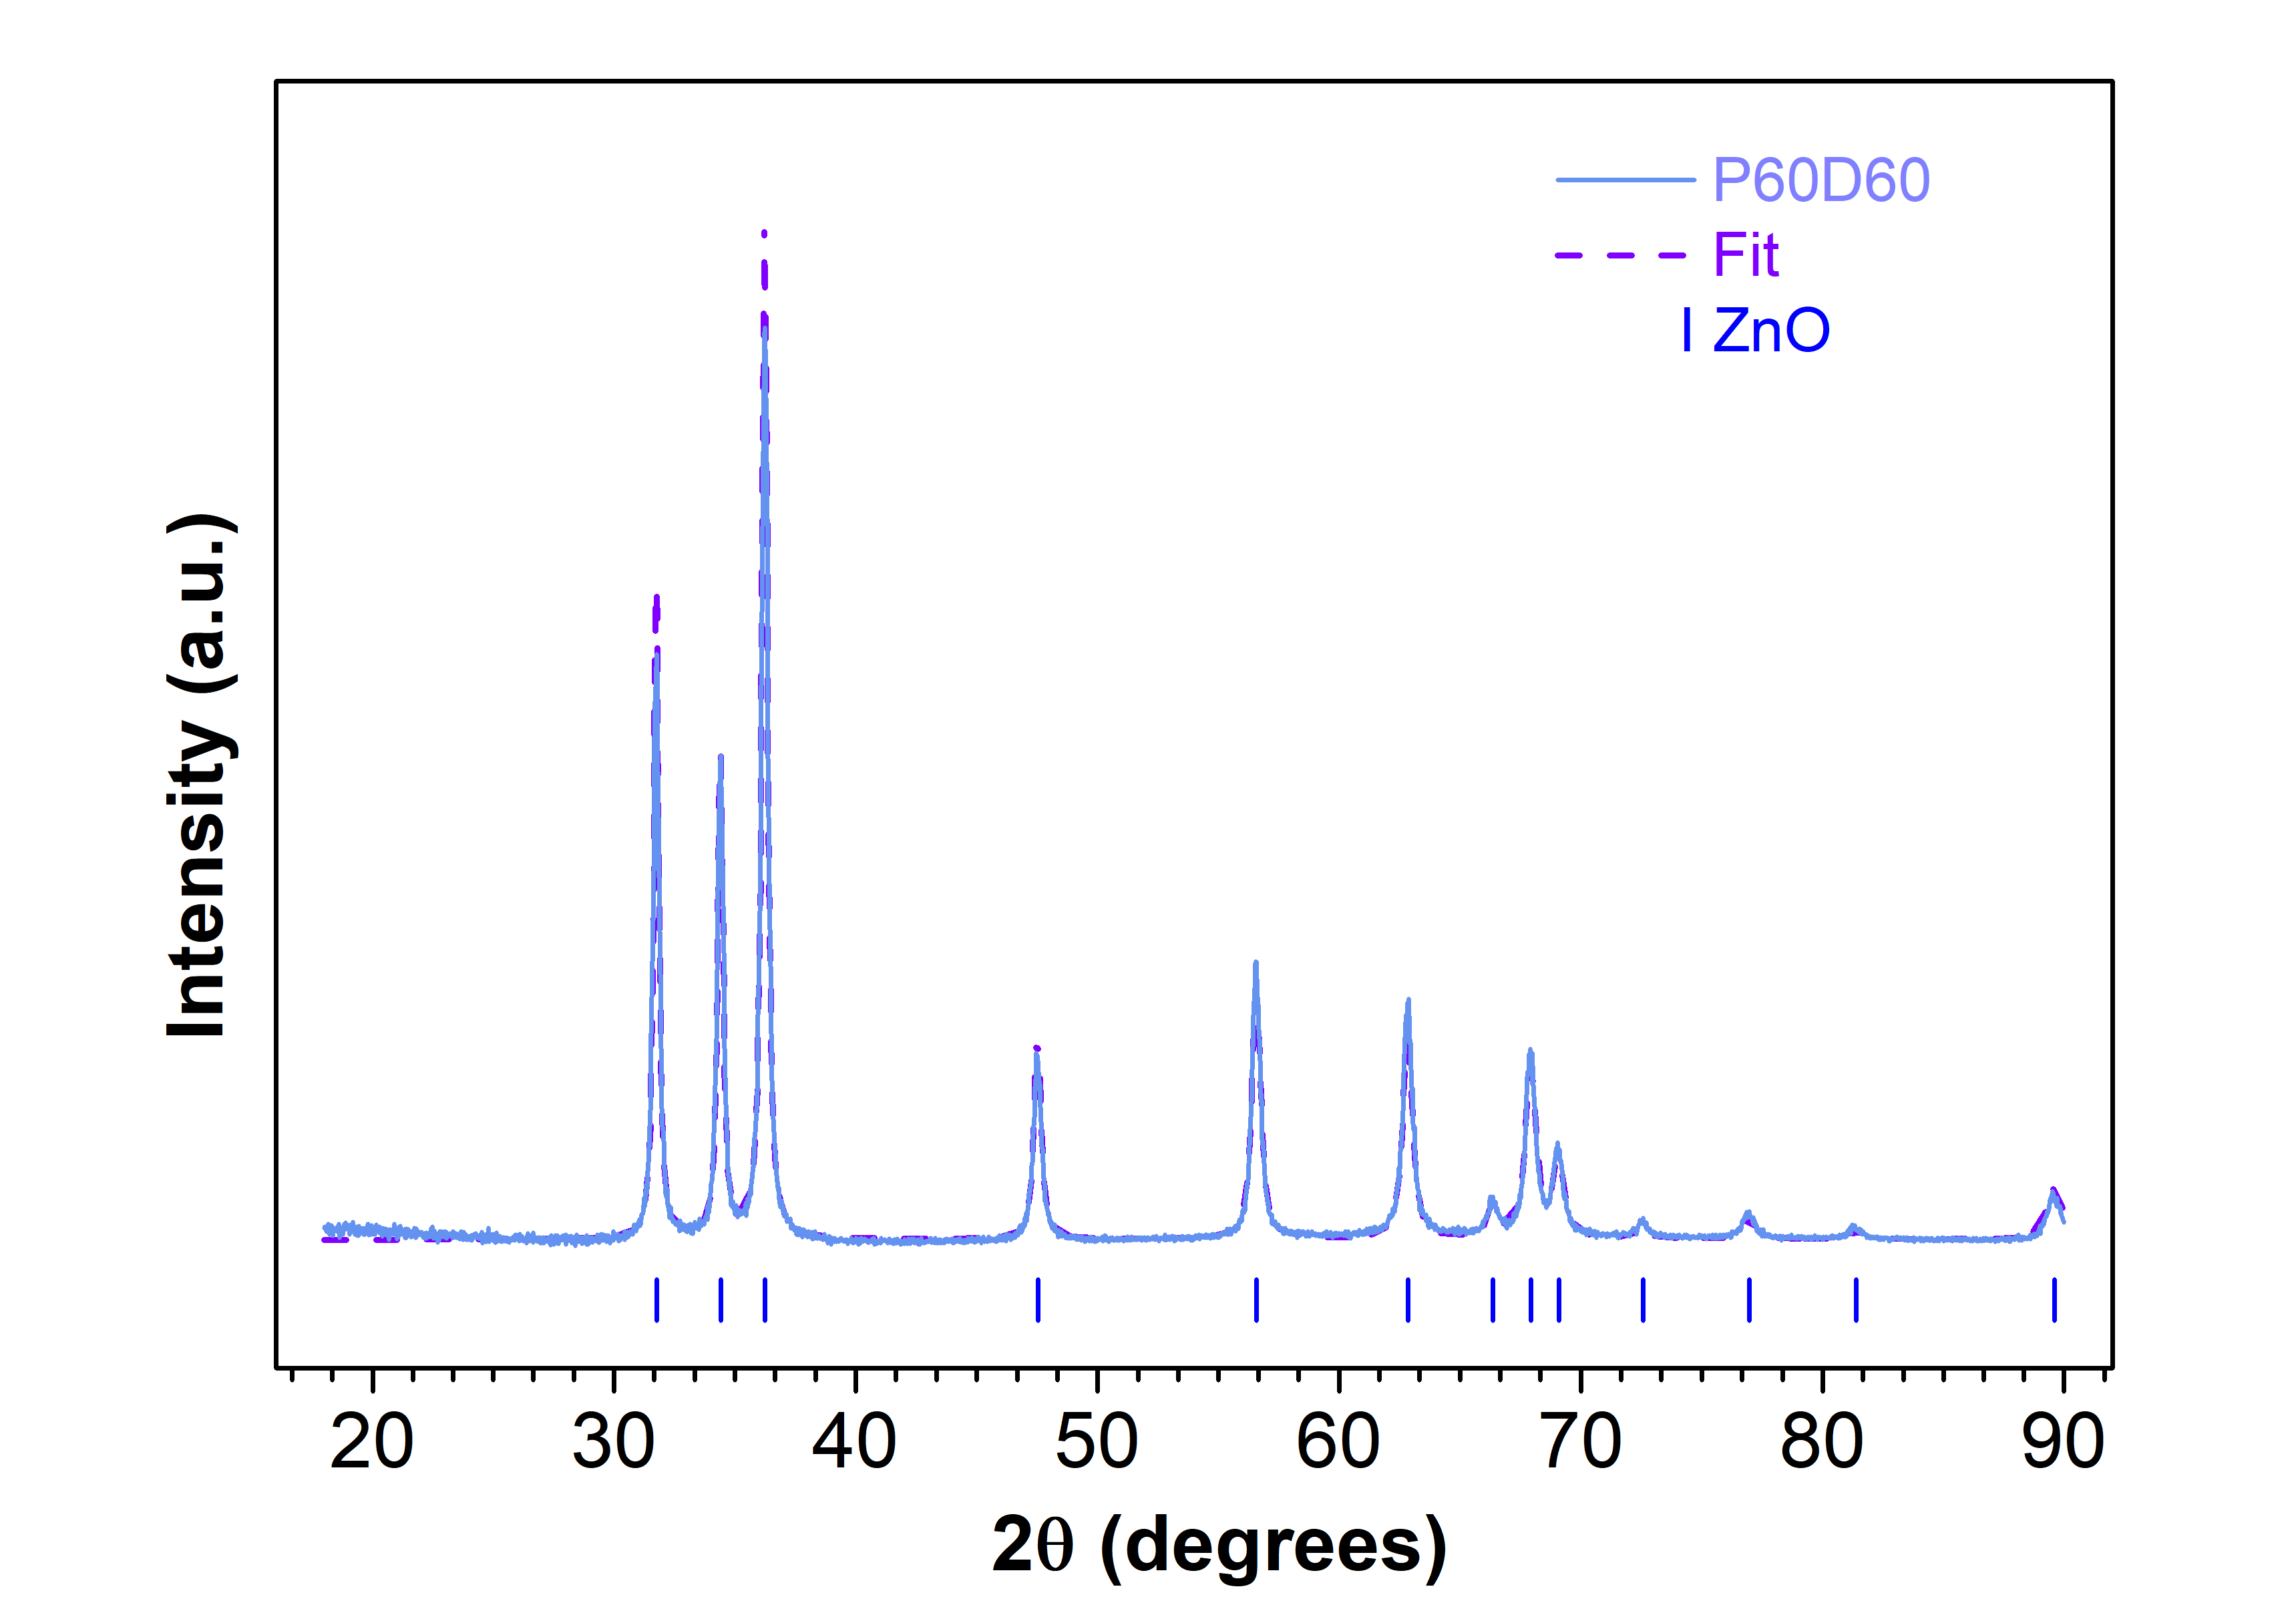


**Figure SI6.** XRD patterns of the sample P60D60 and associated Rietveld fit.
